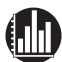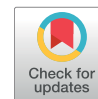

# Is the Consensual Threshold for Defining High Glucose Variability Implementable in Clinical Practice?

Diabetes Care 2021;44:1722–1725 | <https://doi.org/10.2337/dc20-1847>

Jean-Baptiste Julla,<sup>1,2</sup>  
Pauline Jacquemier,<sup>2,3</sup> Guy Fagherazzi,<sup>4-7</sup>  
Tiphaine Vidal-Trecan,<sup>1</sup> Vanessa Juddoo,<sup>1</sup>  
Asma Jaziri,<sup>1</sup> Hanane Mersel,<sup>1</sup>  
Nicolas Venteclef,<sup>2</sup> Ronan Roussel,<sup>2,8</sup>  
Pascale Massin,<sup>9</sup> Aude Couturier,<sup>10</sup>  
Jean-François Gautier,<sup>1,2</sup> and  
Jean-Pierre Riveline<sup>1,2</sup>

## OBJECTIVE

Estimating glycemic variability (GV) through within-day coefficient of variation (%CV<sub>w</sub>) is recommended for patients with type 1 Diabetes (T1D). High GV (hGV) is defined as %CV<sub>w</sub> > 36%. However, continuous glucose monitoring (CGM) devices provide exclusively total CV (%CV<sub>T</sub>). We aimed to assess consequences of this disparity.

## RESEARCH DESIGN AND METHODS

We retrospectively calculated both %CV<sub>T</sub> and %CV<sub>w</sub> of consecutive T1D patients from their CGM raw data during 14 days. Patients with hGV with %CV<sub>T</sub> > 36% and %CV<sub>w</sub> ≤ 36% were called the “inconsistent GV group”.

## RESULTS

A total of 104 patients were included. Mean ± SD %CV<sub>T</sub> and %CV<sub>w</sub> were 42.4 ± 8% and 37.0 ± 7.4% respectively ( $P < 0.0001$ ). Using %CV<sub>T</sub>, 81 patients (73.6%) were classified as having hGV, whereas 59 (53.6%) using %CV<sub>w</sub> ( $P < 0.0001$ ) corresponding to 22 patients (21%) in the inconsistent GV population.

## CONCLUSIONS

Evaluation of GV through %CV in patients with T1D is highly dependent on the calculation method and then must be standardized.

Glycemic variability (GV) refers to the swings in blood glucose levels. High GV (hGV), particularly observed in type 1 diabetes (T1D) (1), is linked to the pathogenesis of diabetes long-term complications and to the risk of severe hypoglycemia (2,3). It is then crucial to well identify patients with hGV. Several metrics could be used to evaluate GV—assessing either its amplitude or its timing (4). An international consensus proposed that the coefficient of variation (%CV) of glucose concentrations, assessed by continuous glucose monitoring (CGM), should be the estimate of GV used, with SD of glucose as a secondary estimate (5). For a given period, several SDs can be computed. SD of glucose concentrations during the total period (SD<sub>T</sub>) (SD for all of the data) includes both the within-day (SD<sub>w</sub>) (mean SD of all of the measurements in a 24-h period) and the between-day (SD<sub>b</sub>) (mean SD over all days at a specified time) variability (6). The %CV is determined by the formula  $[\text{SD}] / [\text{mean glucose}] \times 100$ , in which glucose SD can correspond to these different situations, giving different %CV: %CV<sub>T</sub>  $[\text{SD}_T] / [\text{mean glucose}] \times 100$ , %CV<sub>w</sub>  $[\text{SD}_w] / [\text{mean glucose}] \times 100$ , and %CV<sub>b</sub>  $[\text{SD}_b] / [\text{mean glucose}] \times 100$ . Recently, international recommendations (5) proposed to define hGV as %CV<sub>w</sub>

<sup>1</sup>Department of Diabetology and Endocrinology, Lariboisière Hospital, Assistance Publique - Hôpitaux de Paris, Paris, France

<sup>2</sup>Unité INSERM U1138 Immunity and Metabolism in Diabetes, ImMeDiab Team, Centre de Recherches des Cordeliers, and Université de Paris, Paris, France

<sup>3</sup>Air Liquide Healthcare Explor Center Medicochemical, Paris, France

<sup>4</sup>U1018 INSERM/Center for Research in Epidemiology and Population Health, Institut Gustave Roussy, Villejuif, France

<sup>5</sup>Faculty of Medicine, Paris-South Paris Saclay University, Villejuif, France

<sup>6</sup>UMR 970 INSERM, Cardiovascular Research Center, University of Paris, Paris, France

<sup>7</sup>Digital Epidemiology Hub, Department of Population Health, Luxembourg Institute of Health, Strassen, Luxembourg

<sup>8</sup>Department of Diabetology, Endocrinology, and Nutrition, Bichat-Claude Bernard Hospital, Assistance Publique - Hôpitaux de Paris, Paris, France

<sup>9</sup>Ophthalmology Department, Centre Universitaire du Diabète et de ses Complications, Assistance Publique - Hôpitaux de Paris, Paris, France

<sup>10</sup>Department of Ophthalmology, Lariboisière Hospital, Assistance Publique - Hôpitaux de Paris, Université Paris 7 - Sorbonne Paris Cité, Paris, France

Corresponding author: Jean-Pierre Riveline, [jeanpierre.riveline@aphp.fr](mailto:jeanpierre.riveline@aphp.fr)

Received 22 July 2020 and accepted 14 April 2021

This article contains supplementary material online at <https://doi.org/10.2337/figshare.14461800>.

© 2021 by the American Diabetes Association. Readers may use this article as long as the work is properly cited, the use is educational and not for profit, and the work is not altered. More information is available at <https://www.diabetesjournals.org/content/license>.

>36%, evaluated over a period of at least 14 days, based on a previous study that observed that the number of hypoglycemia events was significantly higher above this threshold (7). SD was computed according to the  $SD_w$  definition; therefore, 36% refers to  $\%CV_w$ . Data from CGM could easily be downloaded from websites, such as LibreView (for FreeStyle Libre: <https://www.libreview.com>) or Dexcom CLARITY (for Dexcom: <https://clarity.dexcom.eu>), helping physicians and patients to interpret GV and adapt insulin doses. In contrast with the international recommendations (5), the one  $\%CV$  automatically given by these websites is  $\%CV_T$ . The aim of this study was to highlight the potential issues induced by this disparity for patients with T1D.

## RESEARCH DESIGN AND METHODS

### Study Design and Participants

Consecutive patients with T1D who uploaded their data from the FreeStyle Libre system to their LibreView account between February and April 2019 were retrospectively screened. Those with >70% of CGM active time for the last 14 days were included. For each patient included, information regarding age, sex, diabetes duration, severe hypoglycemia incidence in the last 6 months, and  $HbA_{1c}$  were collected.

In light of the noninterventive design of this retrospective study, all participants gave oral or written informed consent (inclusion in Middlecare register or nonopposition note) for the use of records for clinical research purposes.

### Analysis of the Data From the CGM

Total glycemic report (one measurement per 15 min) for the last 14 days was downloaded in a .csv file per patient;  $\%CV_T$  and  $\%CV_w$  were calculated according to the following equations:

$$SD_w = \frac{\sqrt{\frac{\sum |x - \bar{x}_{j1}|^2}{(n-1)_{j1}}} + \sqrt{\frac{\sum |x - \bar{x}_{j2}|^2}{(n-1)_{j2}}} + \dots + \sqrt{\frac{\sum |x - \bar{x}_{j14}|^2}{(n-1)_{j14}}}}{14}$$

$$SD_T = \sqrt{\frac{\sum |x - \bar{x}_{j14}|^2}{(n-1)_{j14}}}$$

$$\%CV_T = [SD_T] / [14 \text{ days mean glucose}] \times 100$$

$$\%CV_w = [SD_w] / [14 \text{ days mean glucose}] \times 100$$

Patients were classified into three groups: group 1, the “constantly low GV group” for patients with both  $\%CV_T$  and  $\%CV_w \leq 36\%$ ; group 2, the inconsistent GV group for patients with  $\%CV_T > 36\%$  but with  $\%CV_w \leq 36\%$ ; and group 3, the “constantly high GV group” for patients with both  $\%CV_T$  and  $\%CV_w > 36\%$ . No patients had  $\%CV_T < 36\%$  but  $\%CV_w \geq 36\%$ ; this group was therefore not considered. Characteristics of these three groups were then compared.

### Statistical Analysis

Variables with normal distribution are expressed as mean  $\pm$  SD, and others are expressed as median (quartile 1–quartile 3). Comparisons of means were made with Mann-Whitney  $U$  tests and comparisons of proportions with  $\chi^2$  tests. A Spearman rank correlation test was performed to study the correlation between  $\%CV$  or hypoglycemia parameters and time below range (TBR) or hypoglycemia incidence. Mann-Whitney  $U$  tests,  $\chi^2$  tests, and Spearman rank correlation tests were performed with use of GraphPad Prism, version 8.0.0 for Windows (GraphPad Software, San Diego, CA).

## RESULTS

A total of 104 patients was included, 42% of whom were men, with mean  $\pm$  SD age  $44 \pm 15$  years, diabetes duration  $25.5 \pm 13.5$  years, and  $HbA_{1c}$   $7.3\% \pm 1\%$  (56 mmol/mol). Median  $SD_T$  and  $SD_w$  were, respectively, 72.1 mg/dL (4 mmol/L) and 62.9 mg/dL (3.49 mmol/L) ( $P < 0.0001$ ). Mean  $\%CV_T$  and  $\%CV_w$  were  $42.4 \pm 8$  and  $37.0 \pm 7.4\%$  ( $P < 0.0001$ ) (Fig. 1A).

Both  $\%CV_T$  and  $\%CV_w$  were significantly ( $P < 0.0001$ ) correlated with TBR,  $< 70$  mg/dL ( $r_{CVT} = 0.60$ ;  $r_{CVw} =$

0.61). Neither  $SD_T$  nor  $SD_w$  was significantly correlated with incidence of hypoglycemia or TBR (see Supplementary Table 1). Correlations between TBR and other GV or hypoglycemia parameters are indicated in Supplementary Fig. 1 and Supplementary Table 1.

Using  $\%CV_T$ , 81 patients (73.6%) were classified as having high hGV, and 59 (53.6%) were classified as having high hGV using  $\%CV_w$  ( $P < 0.0001$ ). A total of 23 patients (22%) were in group 1, 22 (21%) in group 2, and 59 (57%) in group 3. In group 2, the number of hypoglycemia events and the TBR were significantly lower in comparison with group 3 and significantly higher in comparison with group 1 (Supplementary Table 2).

$\%CV_T$  was systematically greater than  $\%CV_w$  with a median difference of 5.2% (Fig. 1B). Incidence of hypoglycemia and TBR were significantly higher in patients with  $\%CV > 36\%$ , whatever the formula used ( $P < 0.0001$  for both). An ROC curve showed that 36% and 41% were the best thresholds for predicting TBR for  $\%CV_w$  and  $\%CV_T$ , respectively (Supplementary Fig. 2).

## CONCLUSIONS

The evaluation of GV through  $\%CV$  is dependent on the calculation method: we found a significant difference between  $\%CV_T$  and  $\%CV_w$ . Since  $SD_T$  includes both  $SD_w$  and  $SD_b$  (6), the differences observed between  $SD_T$  and  $SD_w$  (and between  $\%CV_T$  and  $\%CV_w$ ) are due to the contribution of  $SD_b$ . As  $SD_b$  is by definition  $> 0$  (8),  $\%CV_T$  is always above  $\%CV_w$ .

Because of this difference, 20% of our patients with T1D are classified as having low GV and having hGV depending on the SD used for  $\%CV$  calculation. The two consequences of this difference are as follows: 1) It is crucial to standardize the calculation method of  $\%CV$  for evaluation of GV. 2) All studies with evaluation of GV through  $\%CV$  should specify which  $\%CV$  is used.

Whatever the means of calculation,  $\%CV$  was positively correlated with TBR, consistent with previous studies (2,7,9–11), even though incidence of hypoglycemia is also known to be a function of mean glycemia (4,11). However,  $\%CV$  is a metric of GV

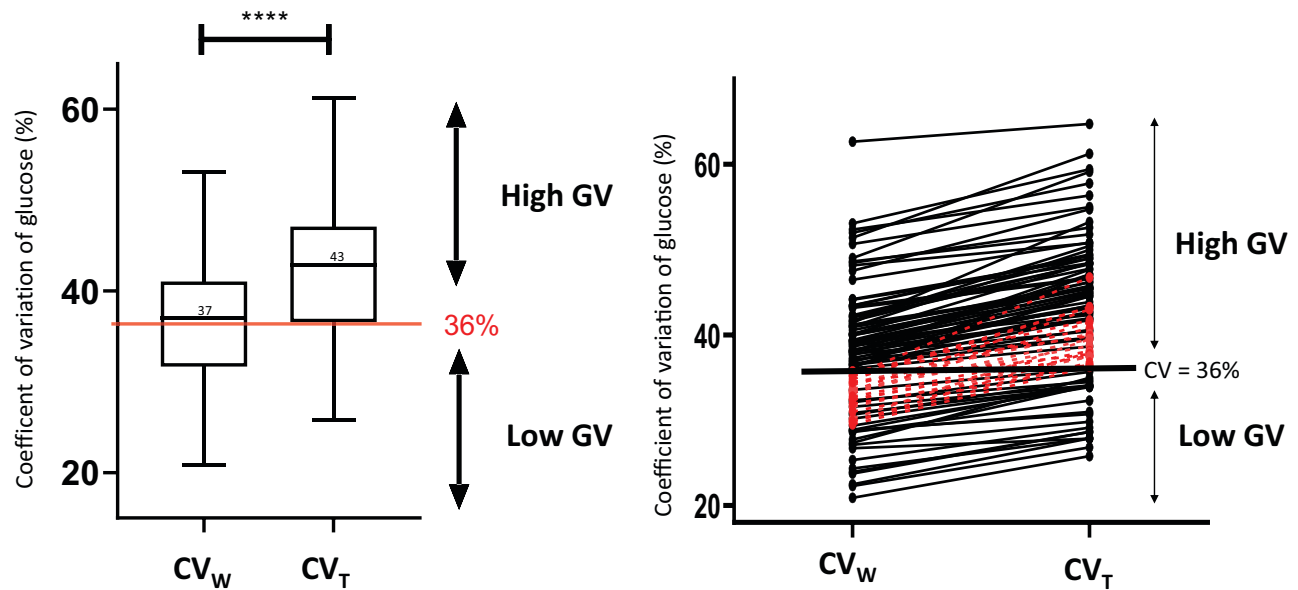

**Figure 1**—Comparison of  $\%CV_w$  and  $\%CV_t$  in consecutive patients with type 1 diabetes. Box plot of  $\%CV$  (A) and corresponding  $\%CV$  for each patient (B) according to the method of calculation. \*\*\*\* $P < 0.0001$ . CVs refer to CVs of glucose.  $CV_w$  is recommended for assessment of GV, and  $CV_t$  is given in LibreView and Dexcom CLARITY.

based on both glucose values below and glucose values above target range and, as confirmed in our study, is less effective in evaluation of the risk of hypoglycemia than specific hypoglycemia indices such as the low blood glucose index (LBGI) (12), which are only based on the glucose values below target (Supplementary Fig. 1 and Supplementary Table 1).

In our cohort, patients with consistently high CV have higher incidence of hypoglycemia events in comparison with other groups. These patients are considered as hGV on the basis of  $\%CV_w$  with a threshold at 36% and constitute 56% of our population with T1D, consistent with the findings of Monnier et al. (7).

In clinical practice, GV assessment should help with identification of patients at risk for severe hypoglycemia. According to the 36% threshold, a high proportion of our population was classified as hGV: 54% on the basis of  $\%CV_w$  or 74% based on  $\%CV_t$ . Considering that 31.5%–40.5% of subjects with T1D have severe hypoglycemia, (13–15), the large proportion of hGV-classified patients shows the limit of using the  $\%CV_w$  or  $\%CV_t$  36% threshold to evaluate severe hypoglycemia risk.

Prospective studies are needed to determine which aspect of GV (i.e.,  $\%CV_t$ ,  $\%CV_w$ ,  $\%CV_b$ , mean amplitude of glycemic

excursion, or LBGI, etc.) and which thresholds of these parameters are the best indices for prediction of severe hypoglycemia risk in patients with T1D, for a given mean glycemia.

**Acknowledgments.** Dr. Stevann Volant, UMR 3756 IP CNRS, Bioinformatics and Biostatistics Hub (C3BI), Institut Pasteur, Paris, France, contributed to the mathematical aspects of this work. Dr. F. Alzaid, Unite INSERM U1138 Immunity and Metabolism in Diabetes, ImMe-Diab Team, Centre de Recherches des Cordeliers, and Université de Paris, Paris, France a native English speaker, acts a guarantor of the manuscript language and grammar.

**Funding.** This study was funded by the “Société Francophone du diabète (SFD)” and by ASSERADT (a nonprofit patient association).

**Duality of Interest.** J.-B.J. reports personal fees and nonfinancial support from Novo Nordisk and nonfinancial support from Merck Sharp & Dohme (MSD). G.F. has received consulting fees from Lilly, MSD, Roche Diabetes Care, AstraZeneca, Diabeloop, and Danone Research. T.V.-t. has received consulting fees from MSD and Novo Nordisk. R.R. is an advisory panel member for AstraZeneca, Sanofi, MSD, Eli Lilly, Boehringer Ingelheim, Janssen, Mundipharma, Novo Nordisk, and Physiogenex and has received research funding from and provided research support to Amgen, Diabnext, Sanofi, and Novo Nordisk. P.M. has received consulting fees from Allergan, Bayer, Novartis, Horus, and Thea. J.-F.G. reports personal fees and nonfinancial support from Eli Lilly, personal fees and nonfinancial support from Novo Nordisk, personal fees and nonfinancial support from Gilead, and personal

fees and nonfinancial support from AstraZeneca. J.-P.R. is an advisory panel member for Sanofi, MSD, Eli Lilly, Novo Nordisk, Abbott, and Medtronic and has received research funding from and provided research support to Abbott, Air Liquide, Sanofi, and Novo Nordisk. No other potential conflicts of interest relevant to this article were reported.

**Author Contributions.** J.-B.J. contributed to patient recruitment, CGM data download, and analysis and writing of the manuscript. P.J. and G.F. contributed to the data analysis and reviewed the manuscript. V.J., A.J., T.V.T., and H.M. contributed to patient recruitment and reviewed the manuscript. N.V., R.R., P.M., A.C., and J.-F.G. contributed to data analysis and reviewed the manuscript. J.-P.R. contributed to patient recruitment, CGM data download, and analysis and writing of the manuscript and had final responsibility for the decision to submit for publication. J.-P.R. is the guarantor of this work and, as such, had full access to all the data in the study and takes responsibility for the integrity of the data and the accuracy of the data analysis.

## References

1. Rodbard D. Glucose variability: a review of clinical applications and research developments. *Diabetes Technol Ther* 2018;20:S25–S215
2. Rama Chandran S, Tay WL, Lye WK, et al. Beyond HbA1c: comparing glycemic variability and glycemic indices in predicting hypoglycemia in type 1 and type 2 diabetes. *Diabetes Technol Ther* 2018;20:353–362
3. Kovatchev BP, Cox DJ, Farhy LS, Straume M, Gonder-Frederick L, Clarke WL. Episodes of severe hypoglycemia in type 1 diabetes are preceded and followed within 48 hours by measurable disturbances in blood glucose. *J Clin Endocrinol Metab* 2000;85:4287–4292

4. Kovatchev B, Cobelli C. Glucose variability: timing, risk analysis, and relationship to hypoglycemia in diabetes. *Diabetes Care* 2016;39:502–510
5. Battelino T, Danne T, Bergenstal RM, et al. Clinical targets for continuous glucose monitoring data interpretation: recommendations from the International Consensus on Time in Range. *Diabetes Care* 2019;42:1593–1603
6. Rodbard D. New and improved methods to characterize glycemic variability using continuous glucose monitoring. *Diabetes Technol Ther* 2009;11:551–565
7. Monnier L, Colette C, Wojtusciszyn A, et al. Toward defining the threshold between low and high glucose variability in diabetes. *Diabetes Care* 2017;40:832–838
8. Weiss NA. *A Course in Probability*. London, U.K.: Pearson, 2005, p. 385–386
9. Rodbard D. Clinical interpretation of indices of quality of glycemic control and glycemic variability. *Postgrad Med* 2011;123:107–118
10. Rodbard D. Hypo- and hyperglycemia in relation to the mean, standard deviation, coefficient of variation, and nature of the glucose distribution. *Diabetes Technol Ther* 2012;14:868–876
11. Rodbard D. Metrics to evaluate quality of glycemic control: comparison of time in target, hypoglycemic, and hyperglycemic ranges with “risk indices”. *Diabetes Technol Ther* 2018;20:325–334
12. Gómez AM, Henao DC, Imitola Madero A, et al. Defining high glycemic variability in type 1 diabetes: comparison of multiple indexes to identify patients at risk of hypoglycemia. *Diabetes Technol Ther* 2019;21:430–439
13. Gruden G, Barutta F, Chaturvedi N, et al. Severe hypoglycemia and cardiovascular disease incidence in type 1 diabetes: the EURODIAB Prospective Complications Study. *Diabetes Care* 2012;35:1598–1604
14. Pedersen-Bjergaard U, Pramming S, Heller SR, et al. Severe hypoglycaemia in 1076 adult patients with type 1 diabetes: influence of risk markers and selection. *Diabetes Metab Res Rev* 2004;20:479–486
15. ter Braak EW, Appelman AM, van de Laak M, Stolk RP, van Haeften TW, Erkelens DW. Clinical characteristics of type 1 diabetic patients with and without severe hypoglycemia. *Diabetes Care* 2000;23:1467–1471
